# Supplementary material for: Low-mass molecular dynamics simulation for configurational sampling enhancement: More evidence and theoretical explanation
Source: Biochem Biophys Rep. 2015 Sep 2;4:126–33. doi: 10.1016/j.bbrep.2015.08.023 (PMC5668912; doi:10.1016/j.bbrep.2015.08.023)

## Supporting Information

### Low-mass molecular dynamics simulation for configurational sampling enhancement: More evidence and theoretical explanation

Yuan-Ping Pang

Computer-Aided Molecular Design Laboratory, Mayo Clinic, Rochester, MN 55905, USA

**Table S1.** Numbers of TIP3P waters and ions, initial solvation box size, ionizable residues, and computers used in molecular dynamics simulations for chignolin and CLNo25. **Page 2.**

**Figure S1.** Smoothed time series of  $C\alpha\beta$ RMSD from native conformations for chignolin and CLNo25. Native state population and individual folding time are abbreviated NSP and IFT, respectively. All IFTs and time steps are converted to the standard-mass time. The smoothed curves were generated by the PRISM 5 program for Mac OS X (version 5.0d) from GraphPad Software (La Jolla, California) using 32 neighbors on each size and 6<sup>th</sup> order of the smoothing polynomial. A: Folding CLNo25 using FF14SBIm at 277 K and  $\Delta t = 1.00$  fs (**Page 3**). B: Folding CLNo25 using FF14SB at 277 K and  $\Delta t = 3.16$  fs (**Page 4**). C: Folding chignolin using FF12MC at 300 K and  $\Delta t = 1.00$  fs (**Page 5**). D: Folding chignolin using FF12MCstdm at 300 K and  $\Delta t = 3.16$  fs (**Page 6**). E: Folding CLNo25 using FF14SB at 277 K and  $\Delta t = 2.00$  fs (**Page 7**). F: Folding chignolin using FF12MCstdm at 300 K and  $\Delta t = 2.00$  fs (**Page 8**). G: Folding CLNo25 using FF12MCstdm at 340 K and  $\Delta t = 3.16$  fs (**Page 9**).

**Table S1.** Numbers of TIP3P waters and ions, initial solvation box size, ionizable residues, and computers used in molecular dynamics simulations for chignolin and CLN025.

| Sequence  | # of<br>H <sub>2</sub> O | # of<br>Na <sup>+</sup> | # of<br>Cl <sup>-</sup> | Box size<br>(Å <sup>3</sup> ) | Expt<br>pH | Ionizable Residue                   | Computers used for<br>the simulations |
|-----------|--------------------------|-------------------------|-------------------------|-------------------------------|------------|-------------------------------------|---------------------------------------|
| Chignolin | 1281                     | 5                       | 3                       | 33x34x53                      | 5.5        | ASP <sup>3</sup> , GLU <sup>5</sup> | Mac Pros & Xserve                     |
| CLN025    | 1532                     | 6                       | 4                       | 35x37x55                      | 5.7        | ASP <sup>3</sup> , GLU <sup>5</sup> | Mac Pros & Xserve                     |

Xserve: a cluster of Apple Xserves with 400 G5 processors (2.2/2.4 GHz). Mac Pros: a cluster of 100 12-core Apple Mac Pros with Intel Westmere (2.40/2.93 GHz).

Fig. S1A

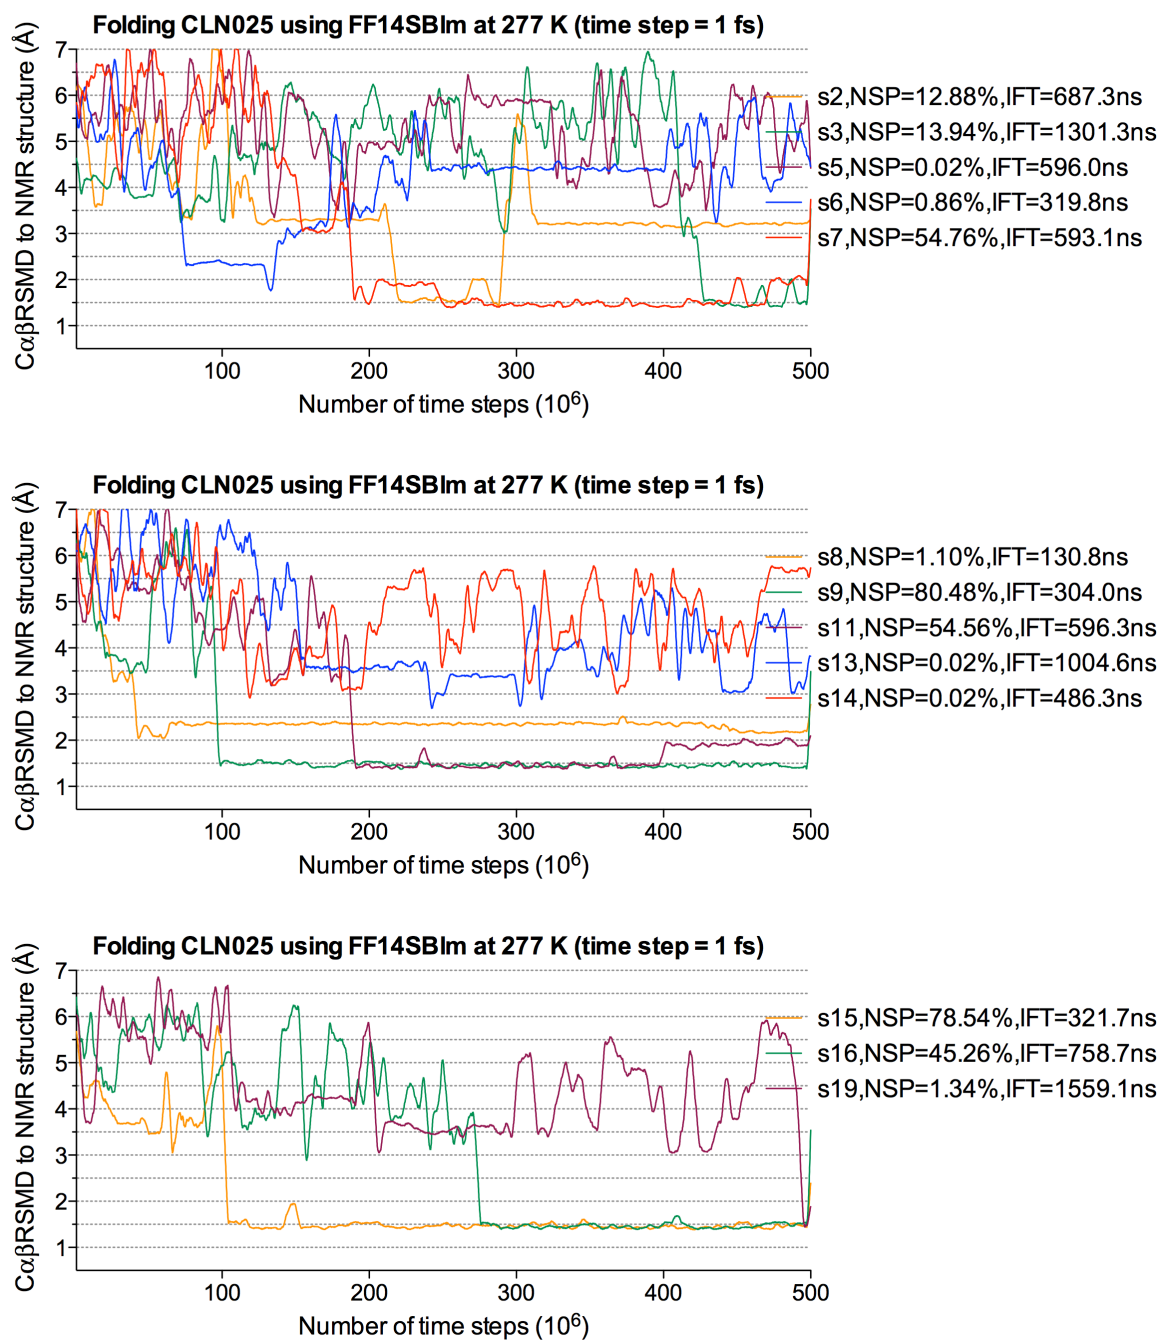

Fig. S1B

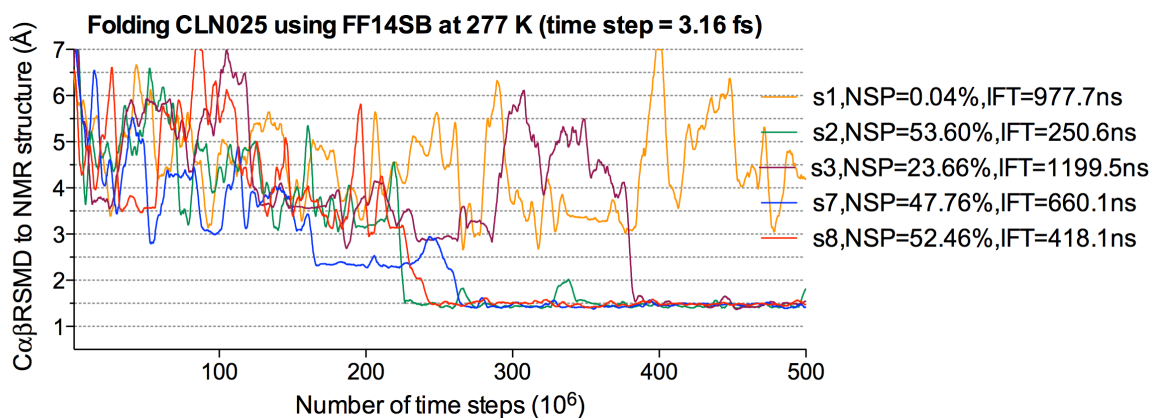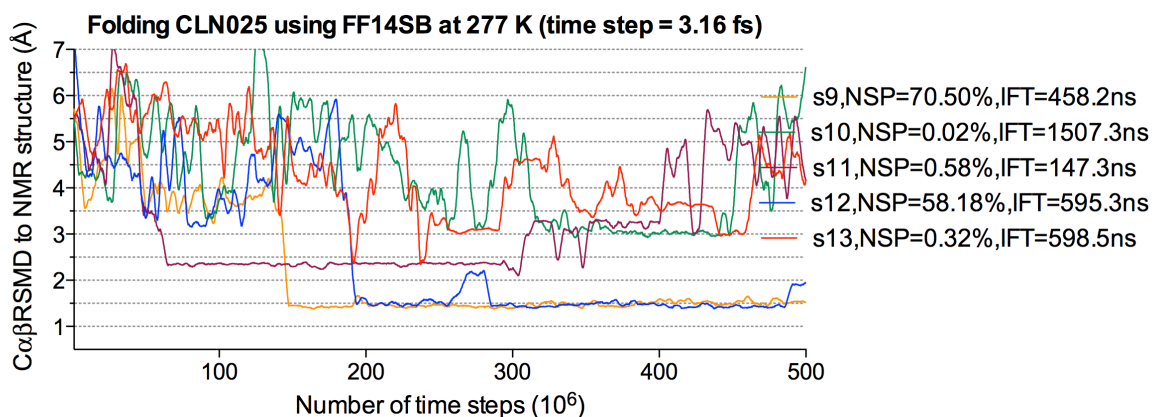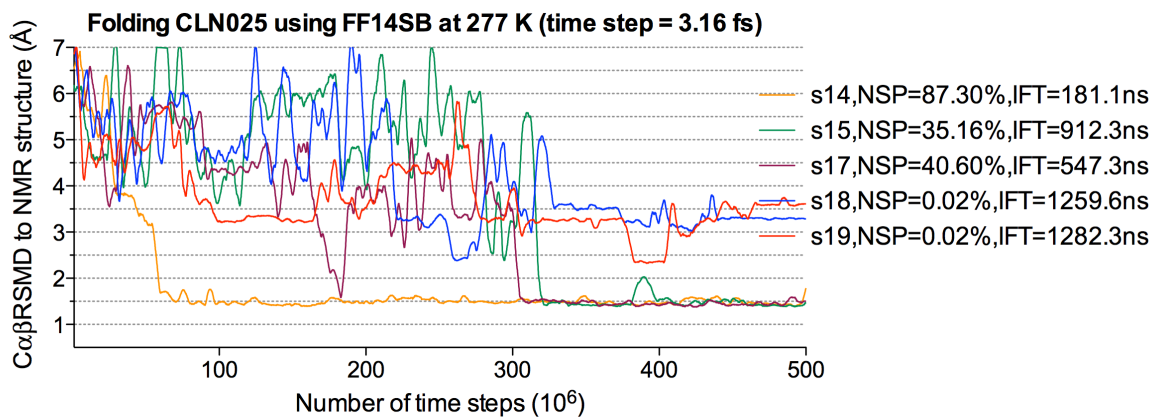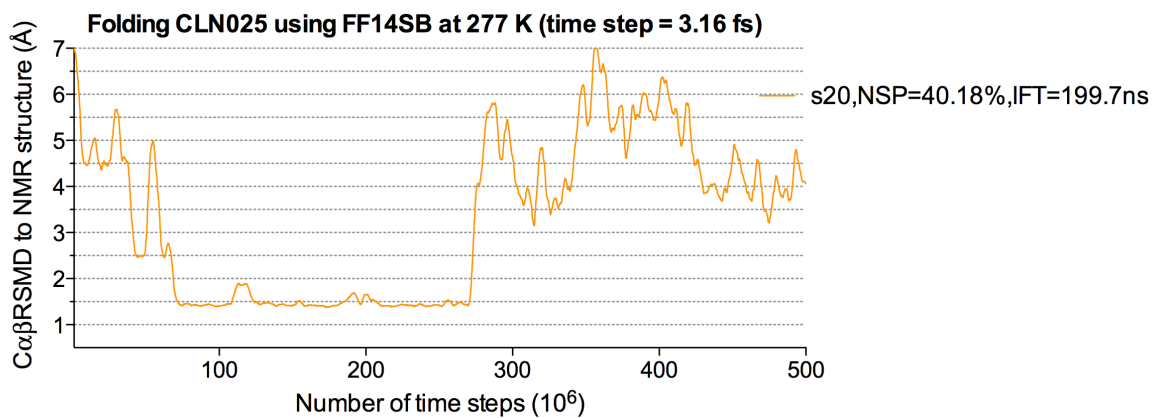

Fig. S1C

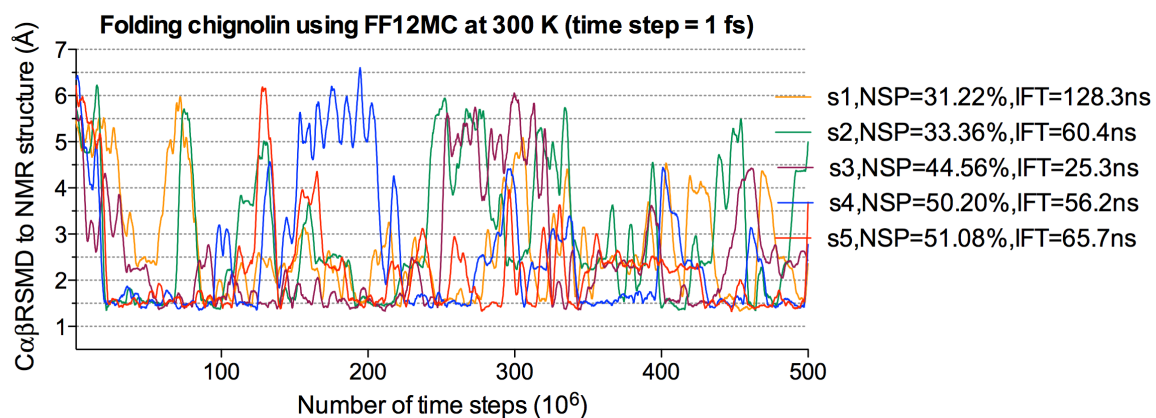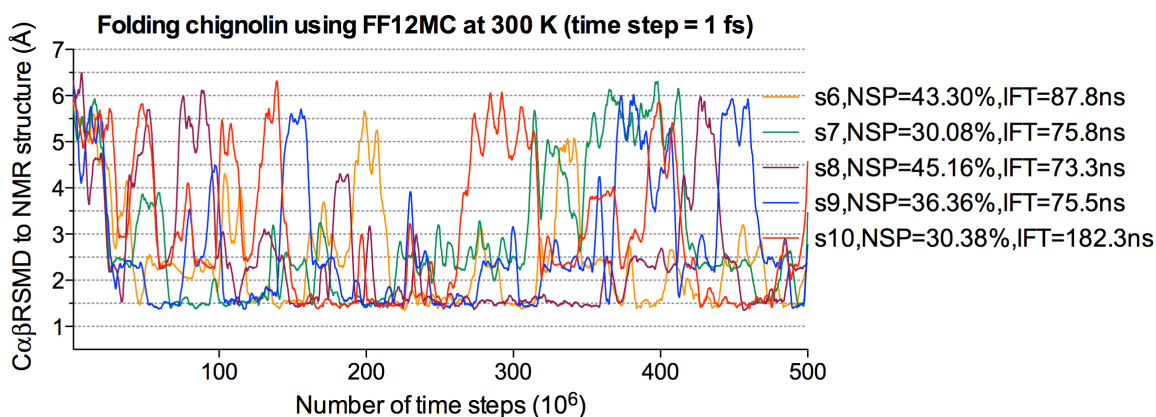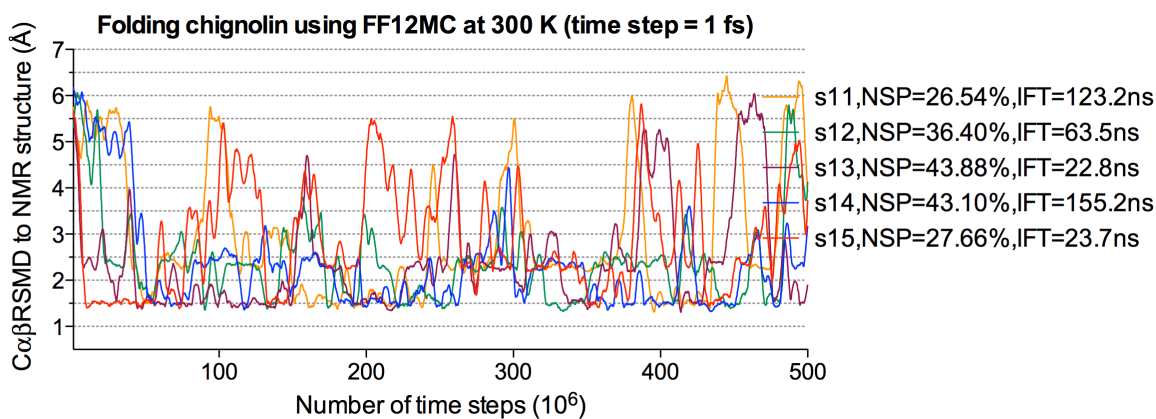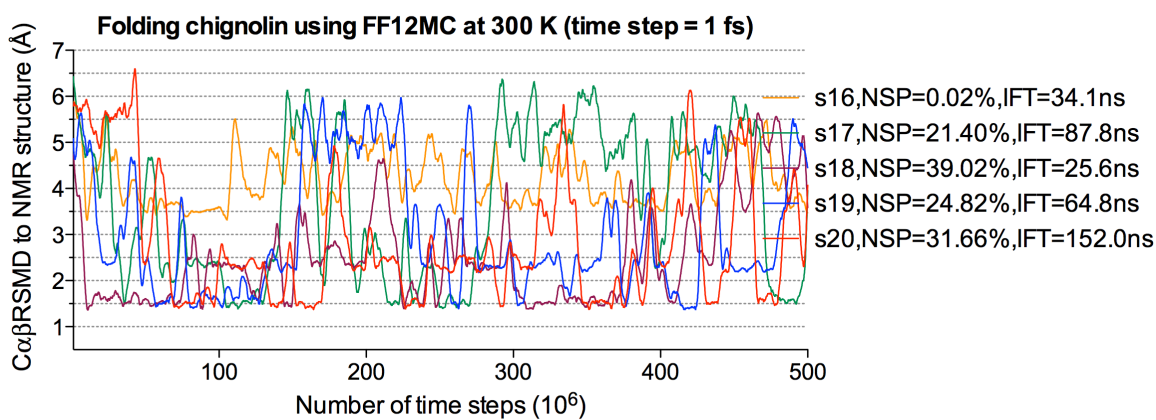

Fig. S1D

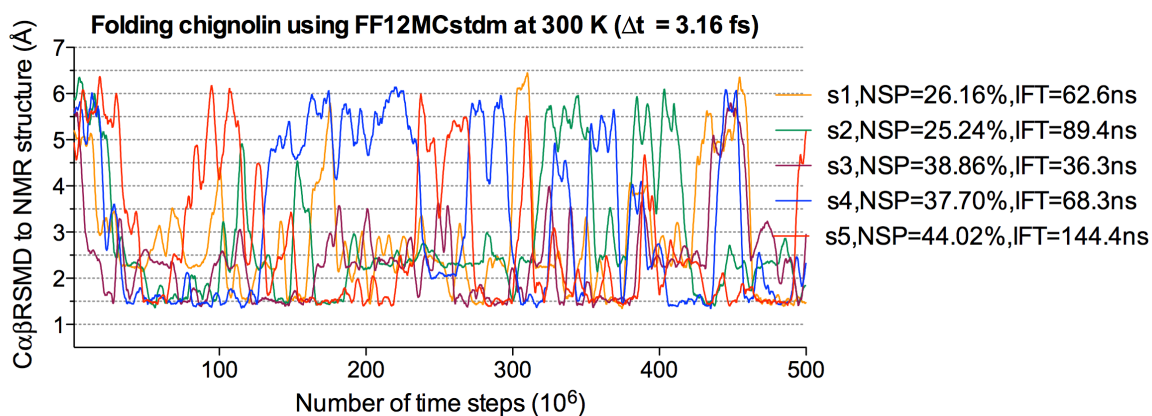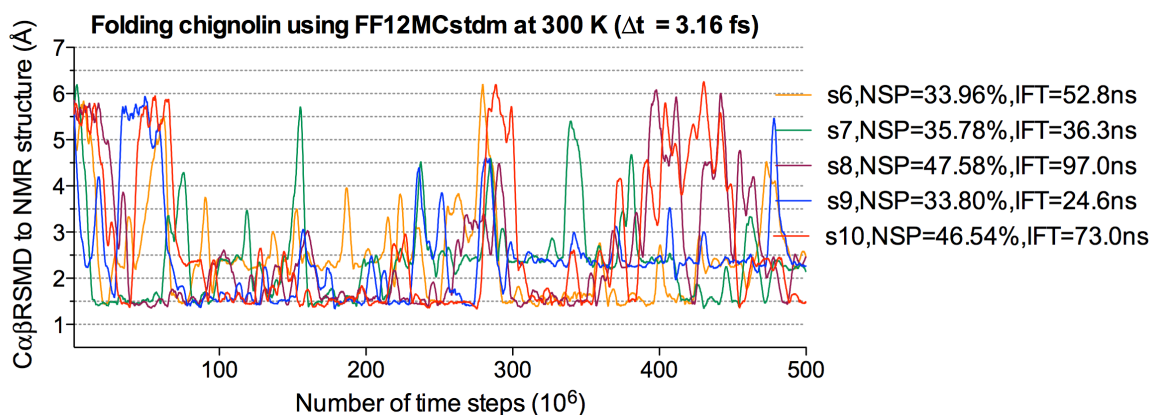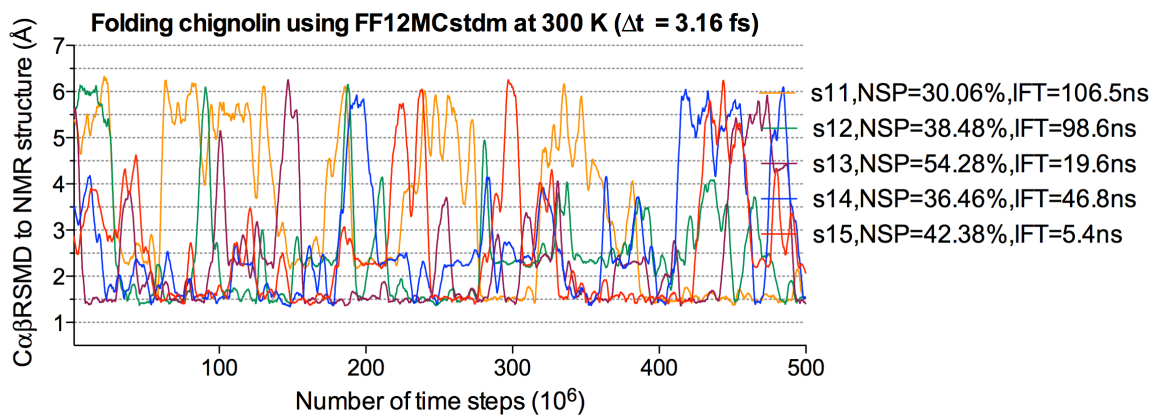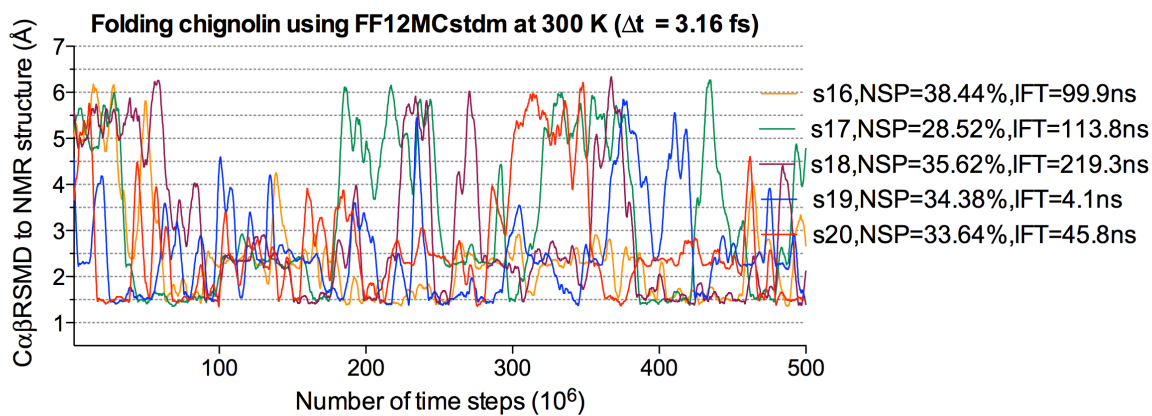

Fig. S1E

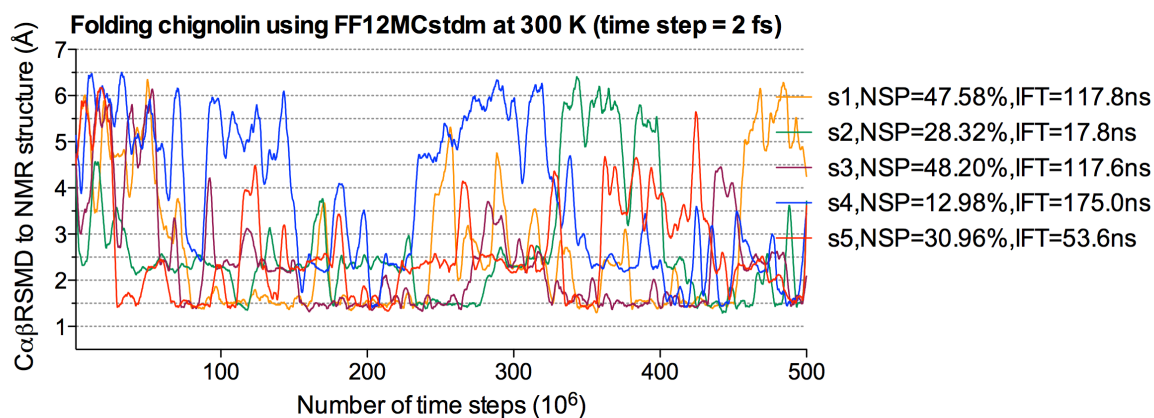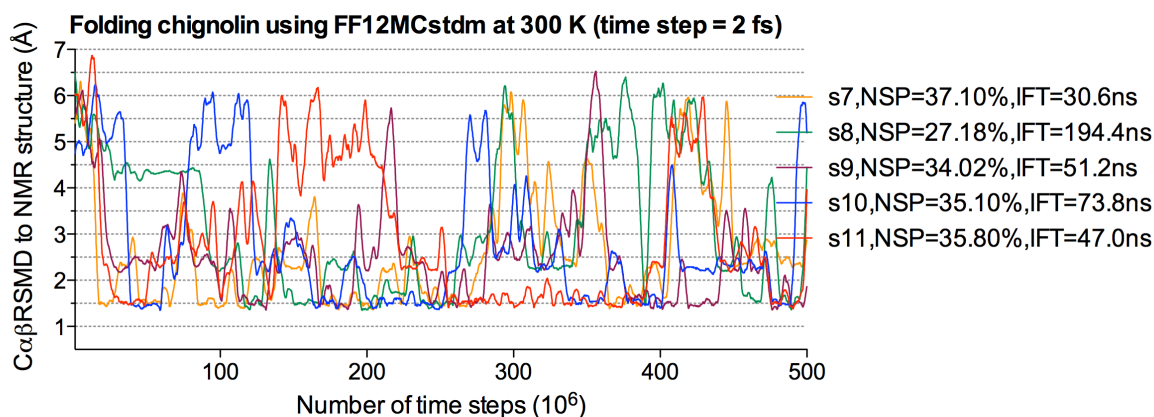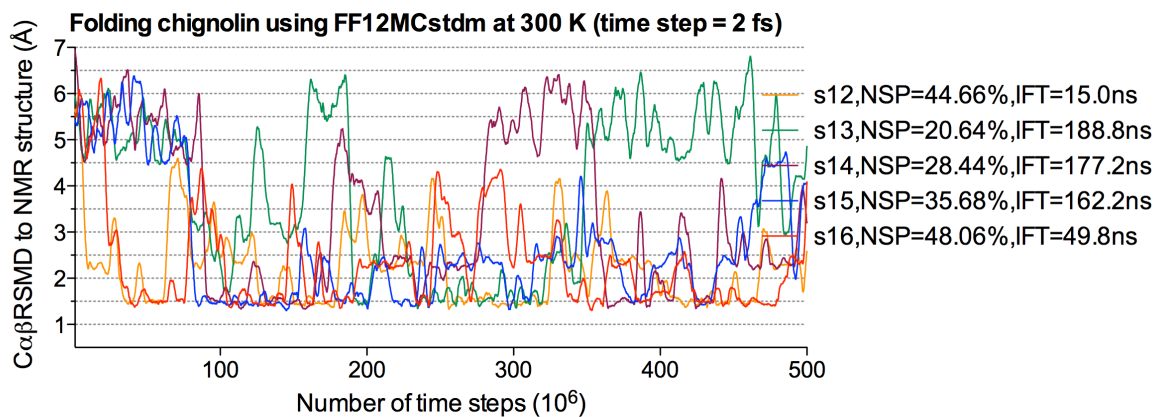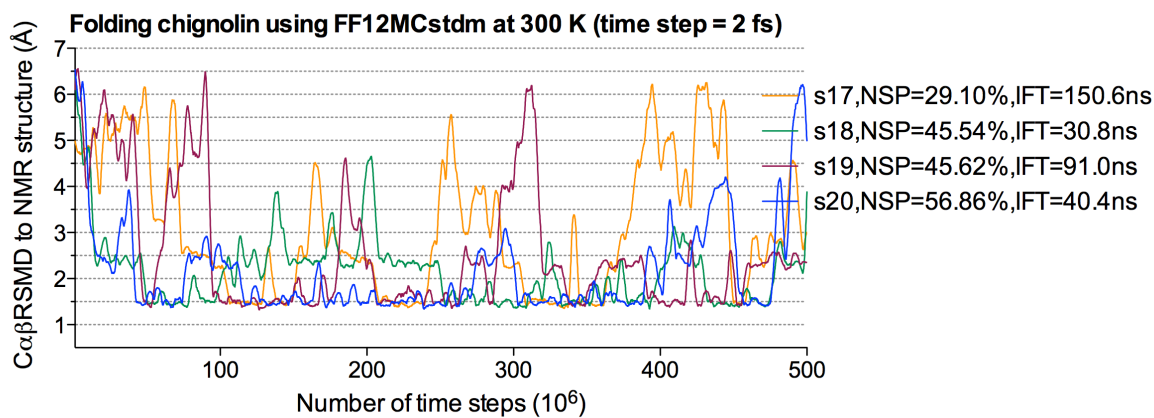

Fig. S1F

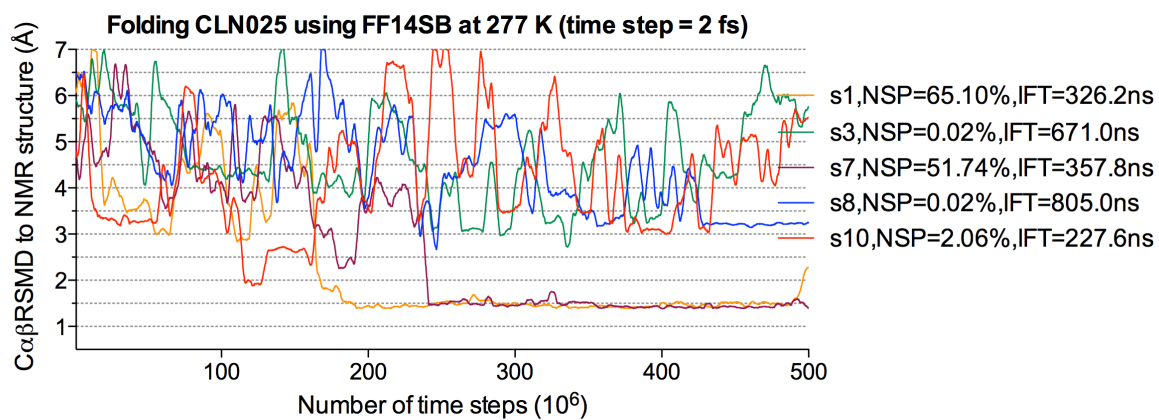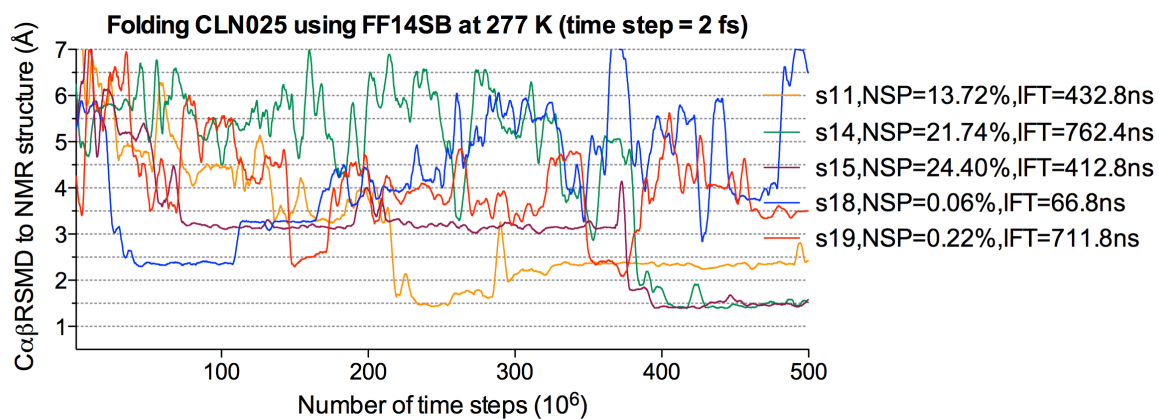

Fig. S1G

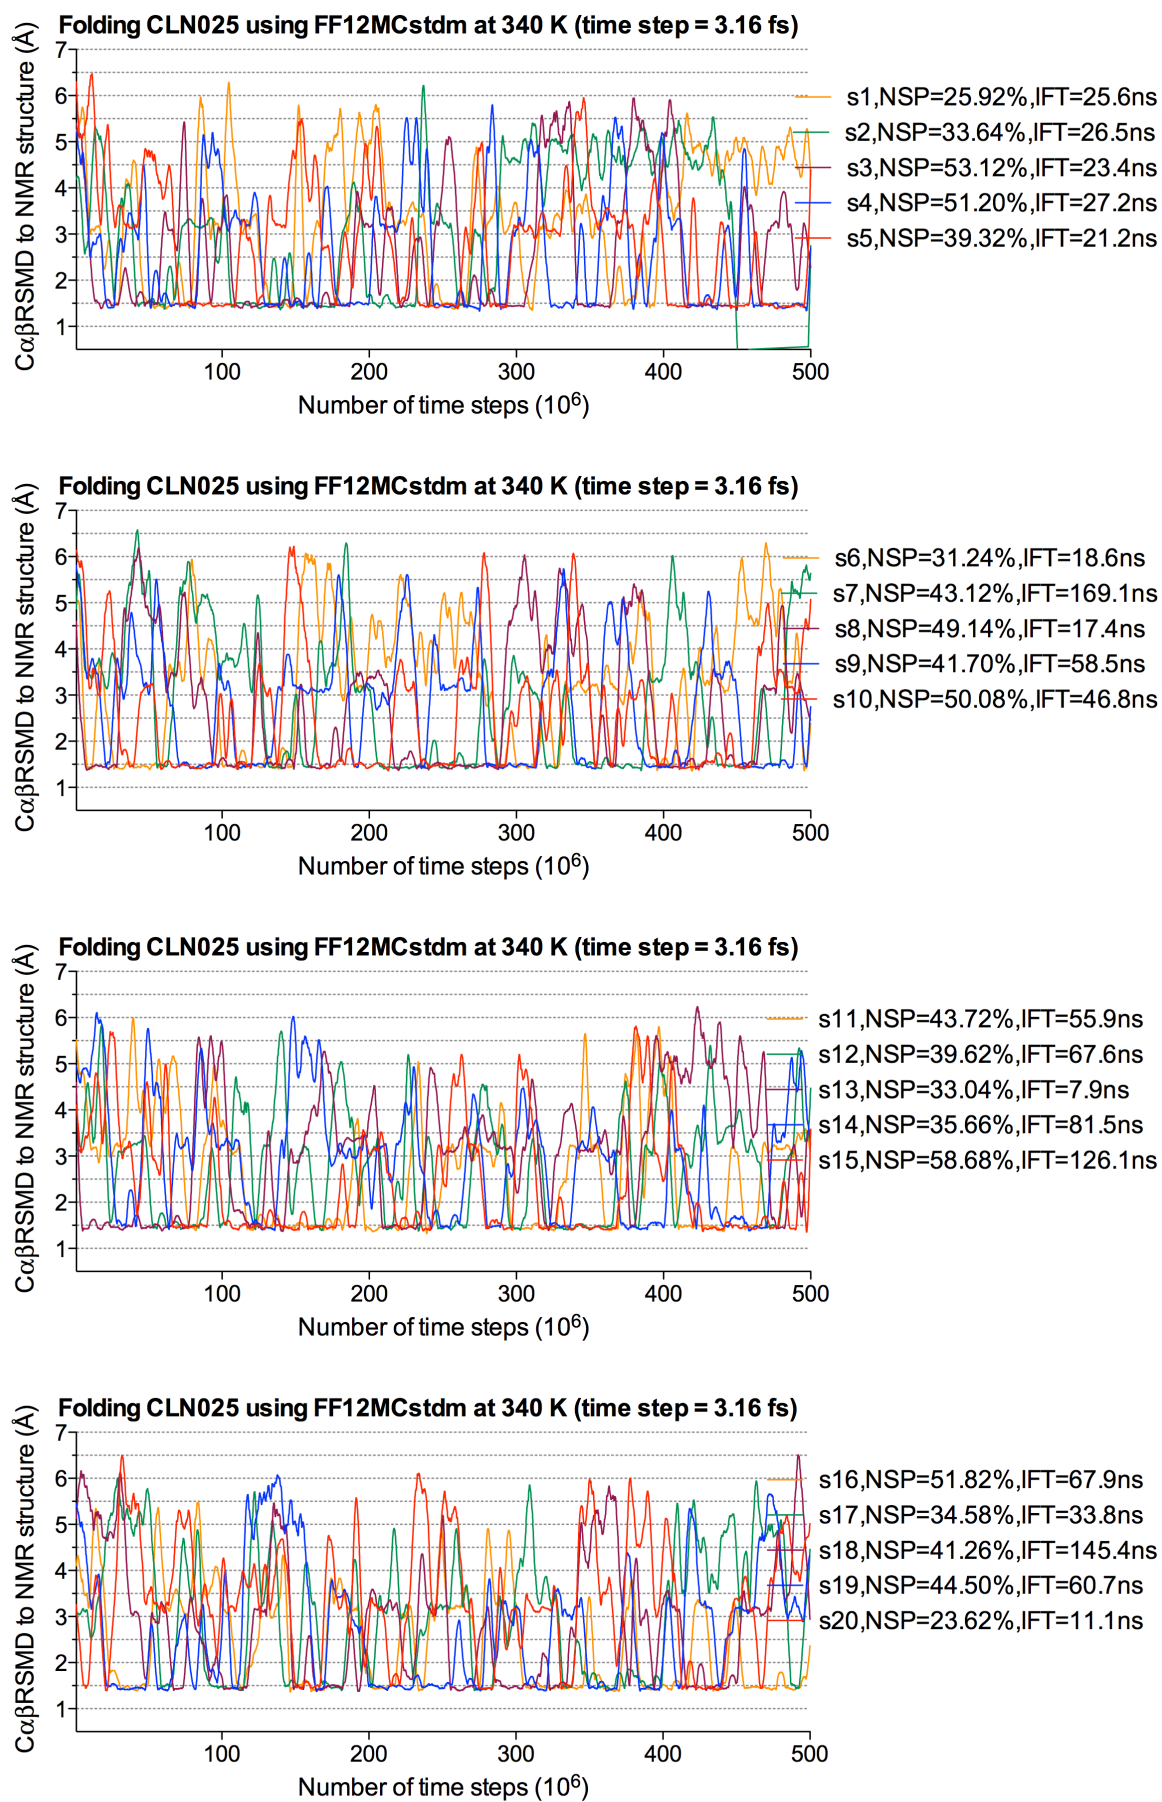

Supplement: Supplementary file 1 — Supplementary material [file mmc1.pdf]
